# Supplementary material for: Standardized Uptake Value for 18F-Fluorodeoxyglucose Is a Marker of Inflammatory State and Immune Infiltrate in Cervical Cancer
Source: Oxford University Press journal article supplement (doi:10.1158/1078-0432.ccr-20-4450), 2021-04-05
Supplement: 10780432ccr204450-sup-255500_2_supp_7002172_qqdkhs.docx [file 10780432ccr204450-sup-255500_2_supp_7002172_qqdkhs.docx]

**Supplemental Table 1:** Bootstrap multivariate analysis results. A Cox multivariate analysis was performed on 1000 subgroups half the size of the overall SUVmax cohort selected by random sampling. The median hazard ratios and p-values when each variable was included in the model are shown.

| **Variable** | **Inclusion in Model (%)** | **Median Hazard Ratio** | **Median p-value** |
| --- | --- | --- | --- |
| SUVmax  (≥ vs < 11.41) | 63.3 | 2.07 | 0.007 |
|  |  |  |  |
| FIGO Stage | 72.1 |  |  |
| II vs. I |  | 1.13 | 0.39 |
| III vs. I |  | 2.32 | 0.001 |
| IV vs. I |  | 2.73 | 0.077 |
|  |  |  |  |
| Lymph Nodes | 96.5 |  |  |
| Pelvic vs. none |  | 1.28 | 0.27 |
| Para-aortic/supra-  clavicular vs. none |  | 3.09 | < 0.001 |
|  |  |  |  |
| Age | 12.6 | 0.98 | 0.015 |
|  |  |  |  |
| Histology | 12.0 | 0.57 | 0.02 |
